# Supplementary figures and images for: Patterns of glycaemic control in patients with type 2 diabetes mellitus initiating second‐line therapy after metformin monotherapy: Retrospective data for 10 256 individuals from the United Kingdom and Germany
Source: PubMed Central journal article supplement — Diabetes Obes Metab. 2017 Sep 28;20(2):389–99. doi: 10.1111/dom.13083 (PMC5813147; doi:10.1111/dom.13083), 2017-09-28

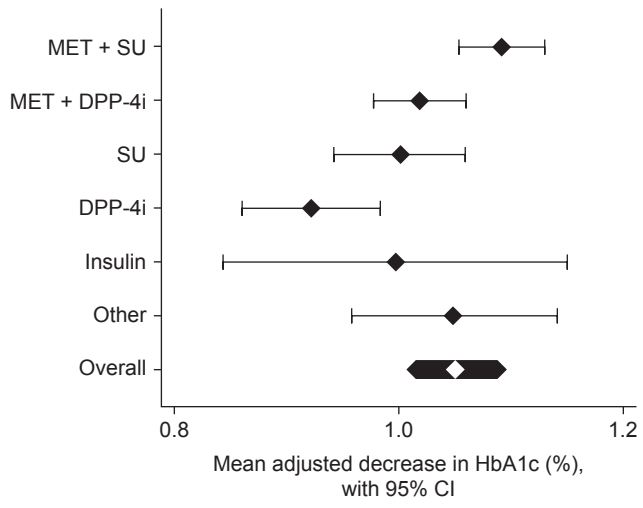

Supplement: DOM-20-389-s002.pdf [file DOM-20-389-s002.pdf]
